# Supplementary material for: Aerial parts of maca (Lepidium meyeniiWalp.) as functional vegetables with gastrointestinal prokinetic efficacyin vivo
Source: Royal Society of Chemistry journal article supplement (doi:10.1039/c8fo00405f), 2018-01-01
Supplement: c8fo00405f1.pdf [file c8fo00405f1.pdf]

## Supplementary Information

### **Aerial parts of maca (*Lepidium meyenii* Walp.) as functional vegetables with gastrointestinal prokinetic efficacy *in vivo***

Wenwen Jin<sup>a,b</sup>, Xuemin Chen<sup>a,b</sup>, Qing Huo<sup>a,b</sup>, Yajie Cui<sup>a,b</sup>, Zejun Yu<sup>a,b</sup> and Longjiang Yu<sup>a,b\*</sup>

Affiliation:

<sup>a</sup> *Institute of Resource Biology and Biotechnology, Department of Biotechnology, College of Life Science and Technology, Huazhong University of Science and Technology, Wuhan 430074, China*

<sup>b</sup> *Key Laboratory of Molecular Biophysics, Ministry of Education, Wuhan, 430074, China*

\* Corresponding to:

*Institute of Resource Biology and Biotechnology, Department of Biotechnology, College of Life Science and Technology, Huazhong University of Science and Technology, 1037 Luoyu Road, Wuhan 430074, P. R. China*

*E-mail addresses: yulongjiang@hust.edu.cn. (Longjiang Yu)*

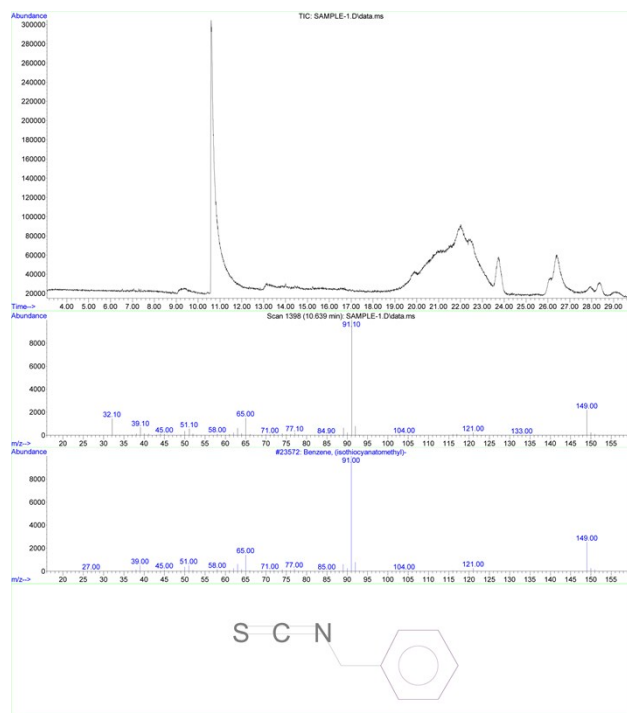

Fig. S1 The TIC and GC-MS profile of the APM powder, and the structure of BITC compared with the database.
